# Supplementary material for: Development of separate-type Pt-free photofuel cells based on visible-light responsive TiO2 photoanode
Source: Royal Society of Chemistry journal article supplement (doi:10.1039/c2jm32064a), 2012-01-01
Supplement: c2jm32064a.pdf [file c2jm32064a.pdf]

**SUPPORTING INFORMATION**

# Development of separate-type Pt-free photofuel cells based on visible-light responsive TiO<sub>2</sub> photoanode

*Kazushi Iyatani,<sup>a</sup> Yu Horiuchi,<sup>\*a</sup> Madoka Moriyasu,<sup>a</sup> Shohei Fukumoto,<sup>a</sup> So-Hye Cho,<sup>b</sup>*

*Masato Takeuchi,<sup>a</sup> Masaya Matsuoka,<sup>\*a</sup> and Masakazu Anpo<sup>a</sup>*

<sup>a</sup>Department of Applied Chemistry, Graduate School of Engineering, Osaka Prefecture University,  
1-1, Gakuen-cho, Naka-ku, Sakai-shi, Osaka 599-8531, Japan

<sup>b</sup>Nano-Materials Research Center, Korea Institute of Science and Technology,  
Hwarangno 14-gil 5, Seongbuk-gu, Seoul 136-791, Korea

[matsumac@chem.osakafu-u.ac.jp](mailto:matsumac@chem.osakafu-u.ac.jp) and [horiiuchi@chem.osakafu-u.ac.jp](mailto:horiiuchi@chem.osakafu-u.ac.jp)

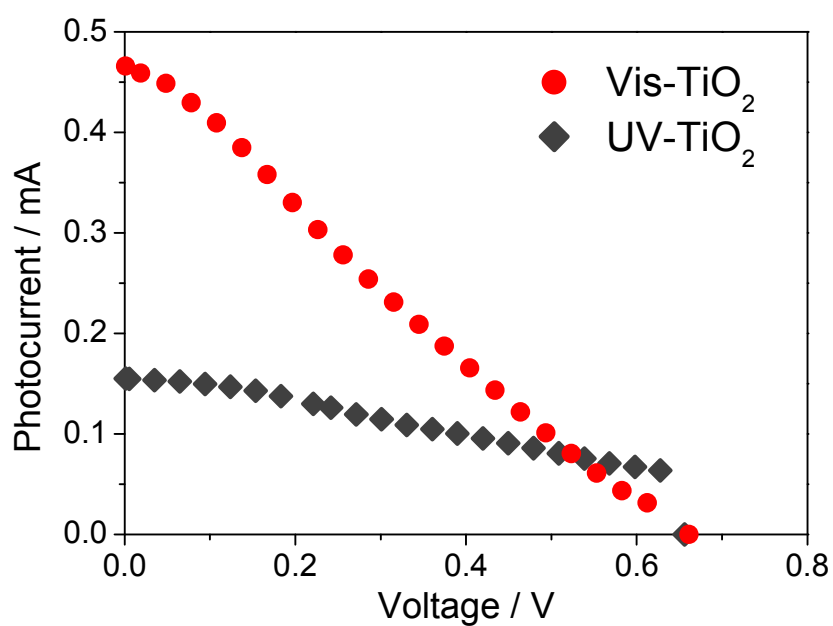

**Figure S1.**  $I$ - $V$  curves of the SPFCs using Vis-TiO<sub>2</sub> (filled circles) and UV-TiO<sub>2</sub> (filled diamonds) thin films as anodes under simulated solar-light irradiation at AM 1.5. The area irradiated was set at 8 mm × 15 mm.

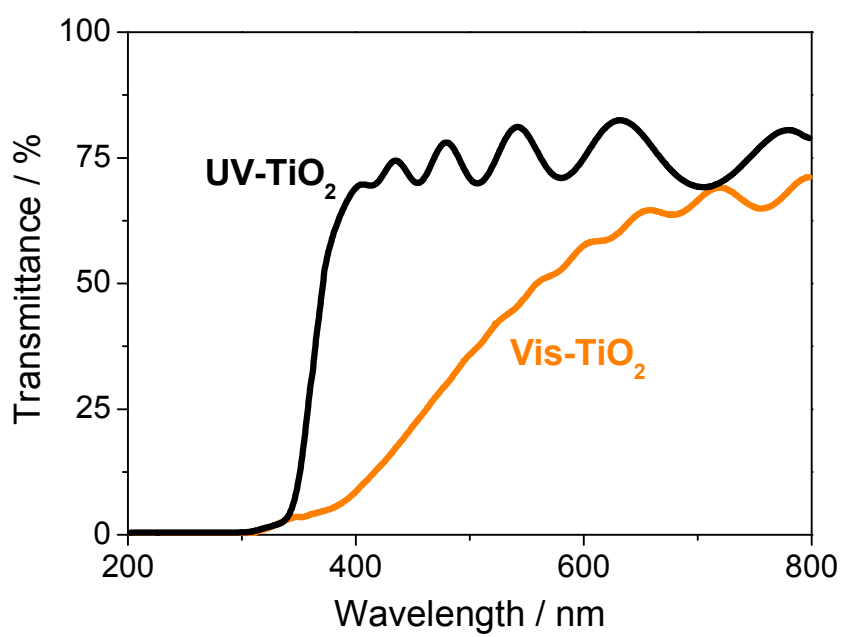

**Figure S2.** UV-vis transmission spectra of Vis-TiO<sub>2</sub> and UV-TiO<sub>2</sub> thin films.

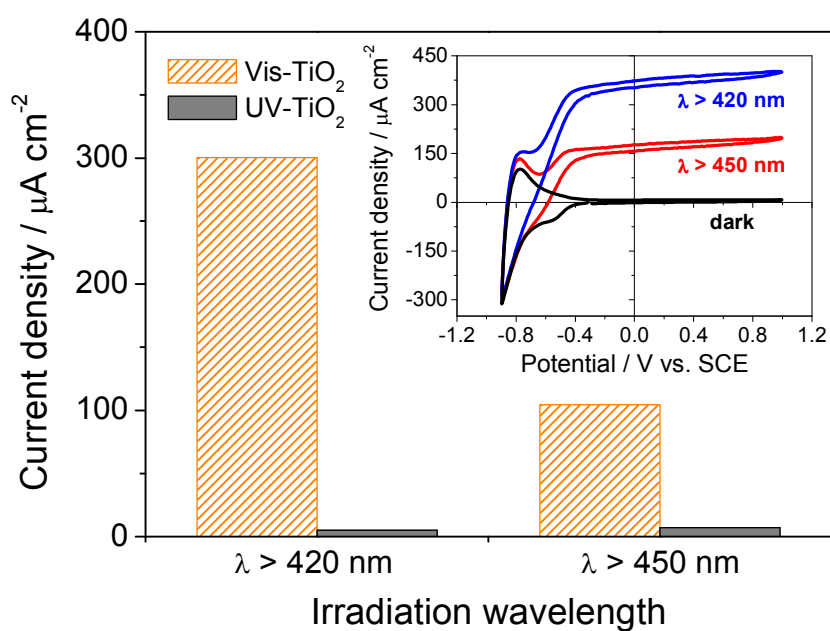

**Figure S3.** Photocurrent densities observed for Vis- $\text{TiO}_2$  and UV- $\text{TiO}_2$  thin films in 0.1 M aqueous  $\text{HClO}_4$  solutions containing 10 vol% methanol under visible-light irradiation ( $\lambda > 420$  and 450 nm) at 0 V vs. SCE. Inset contains cyclic voltammograms of the Vis- $\text{TiO}_2$  thin film under visible-light irradiation ( $\lambda > 420$  and 450 nm) and under dark conditions.
